# Supplementary material for: Saccharomyces cerevisiae goes through distinct metabolic phases during its replicative lifespan
Source: eLife. 2019 Apr 9;8:e41046. doi: 10.7554/eLife.41046 (PMC6467564; doi:10.7554/eLife.41046)
Supplement: Figure 2—source data 1. [file elife-41046-fig2-data1.xlsx]

## Sheet: Sheet1
Metabolite	Intracellular metabolite concentration [mM]
	(Young) labeled cells		Daughter		Mother 10 h		Mother 20 h		Mother 44 h		Mother 68 h
	median	MAD	fit	std	fit	std	fit	std	fit	std	fit	std
Fructose 1,6-bisphosphate	6.49	1.94	5.46	0.25	2.9	0.88	1.61	0.36	0.57	0.24	1.69	1.63
Aspartic acid	12.5	2.83	13.42	0.45	1.27	0.52	0	0	0.66	4.88	0	1.94
Glutamic acid	49.54	13.43	58.49	2.66	0	0.63	8.86	4.97	14.63	21.47	0	0
Adenosintriphosphat	1.52	0.38	2.27	0.1	1.19	0.36	0.71	0.11	0.31	0.27	0.92	0.13
Adenosindiphosphat	0.33	0.09	0.28	0.02	0.18	0.06	0.09	0.03	0.08	0.06	0.09	0.03
Adenosinmonophosphat	0.09	0.03	0.09	0.01	0.06	0.02	0.06	0.01	0.05	0.07	0.01	0.01
Citric acid	3.92	0.82	2.81	0.24	2.47	0.75	1.79	0.24	1.93	2.55	0.12	0.26
Malic acid	1.18	0.48	0.72	0.05	0.17	0.06	0.09	0.12	0.02	0.04	0	0.04
Ribose-5-Phosphate	0.36	0.07	0.33	0.02	0.14	0.04	0.08	0.03	0.17	0.13	0.25	0.07
Ribulose-5-Phosphate	0.14	0.04	0.13	0.01	0.04	0.01	0.01	0.01	0.05	0.04	0.02	0.03
Glucose-6-phosphate	2.75	0.88	2.68	0.12	2.07	0.62	0.88	0.17	0.74	0.48	0	0.28
Phosphoenoylpyruvate	0.06	0.01	0.07	0	0.04	0.01	0.03	0	0.03	0.02	0.02	0.02
Phenylalanine	0.31	0.07	0.68	0.03	0.1	0.06	0.43	0.11	0.42	0.32	0	0
Glucose-1-phosphate	0.07	0.01	0.08	0	0.06	0.02	0.04	0	0.03	0.01	0	0.01
Sedoheptulose-7-phosphate	0.31	0.05	0.33	0.02	0.17	0.05	0.13	0.04	0.13	0.14	0.13	0.11
Fructose-6-phosphate	0.34	0.07	0.34	0.01	0.33	0.08	0.12	0.02	0.11	0.04	0	0.01
Dihyroxy acetone phosphate	2.22	0.78	2.02	0.1	0.26	0.1	0.34	0.14	0.83	0.34	0.25	0.68
Succinic acid	0.15	0.04	0.16	0.01	0	0	0.08	0.01	0.08	0.06	0.11	0.03
