# Supplementary material for: Saccharomyces cerevisiae goes through distinct metabolic phases during its replicative lifespan
Source: eLife. 2019 Apr 9;8:e41046. doi: 10.7554/eLife.41046 (PMC6467564; doi:10.7554/eLife.41046)
Supplement: Figure 2—source data 2. [file elife-41046-fig2-data2.xlsx]

## Sheet: Yields
	Inferred growth rate [h-1] and yields [g g-1]
	(Young) unlabeled cells		Daughter		Mother 0 h		Mother 10 h		Mother 20 h		Mother 44 h		Mother 68 h
	fit	std	fit	std	fit	std	fit	std	fit	std	fit	std	fit	std
growth rate µ	0.2688	0.021	0.3064	0.012	0.2661	0.054	0.1238	0.036	0.0263	0.043	0.0032	0.044	0.0002	0.012
Biomass YX/S	0.1657	0.022	0.1416	0.0062	0.1508	0.03	0.1322	0.032	0.0862	0.12	0.0113	0.15	0.001	0.049
Pyruvate YPyr/S	0.0038	0.0004	0.004	0.0002	0.0027	0.0002	0.0037	0.0009	0.0028	0.0028	-0.0068	0.0085	-0.0048	0.015
Glycerol YGly/S	0.047	0.0051	0.0604	0.0027	0.0614	0.0039	0.049	0.011	0.0504	0.035	0.2619	0.16	0.6468	0.74
Acetate YAc/S	0.0094	0.0011	0.0085	0.0018	0.0051	0.0013	0.0239	0.0084	0.0799	0.045	0.2063	0.14	0.3057	0.38
Ethanol YEtoh/S	0.3278	0.069	0.3698	0.01	0.3323	0.033	0.3254	0.041	0.1149	0.16	-0.1515	0.31	-0.3566	0.98
Carbon dioxide YCo2/S	0.3696	0.045	0.3973	0.017	0.3833	0.035	0.4938	0.08	0.9256	0.39	0.9392	0.47	0.927	0.83
Oxygen YO2/S	0.0047	0.0008	0.0118	0.0047	0.0065	0.0007	0.0074	0.015	0.045	0.12	0.3763	0.36	1.6828	2

## Sheet: Rates
	Inferred growth rate [h-1] and production/consumption rates [mmol gDW-1 h-1]
	(Young) unlabeled cells		Daughter		Mother 0 h		Mother 10 h		Mother 20 h		Mother 44 h		Mother 68 h
	fit	std	fit	std	fit	std	fit	std	fit	std	fit	std	fit	std
growth rate µ	0.269	0.055	0.306	0.022	0.266	0.092	0.124	0.056	0.026	0.067	0.003	0.075	0	0.021
Glucose qGlc	-9.014	1.389	-12.022	0.706	-9.807	2.787	-5.199	1.967	-1.697	3.643	-1.58	30.207	-1.348	93.681
Pyruvate qPyr	0.07	0.013	0.098	0.007	0.054	0.016	0.039	0.017	0.01	0.023	-0.022	-0.421	-0.013	-0.929
Glycerol qGly	0.827	0.156	1.42	0.105	1.177	0.343	0.498	0.219	0.167	0.377	0.809	15.472	1.704	118.443
Acetate qAc	0.255	0.049	0.305	0.067	0.15	0.057	0.372	0.192	0.407	0.903	0.978	18.71	1.236	85.929
Ethanol qEtoh	11.545	3.011	17.371	1.123	12.731	3.833	6.611	2.637	0.762	1.95	-0.935	-17.979	-1.878	-130.635
Carbon dioxide qCo2	13.63	2.676	19.539	1.42	15.378	4.59	10.504	4.324	6.425	14.059	6.072	116.105	5.111	355.312
Oxygen qO2	-0.236	0.053	-0.798	0.321	-0.357	0.108	-0.217	0.446	-0.43	1.471	-3.345	64.012	-12.758	886.899
