# Supplementary material for: Saccharomyces cerevisiae goes through distinct metabolic phases during its replicative lifespan
Source: eLife. 2019 Apr 9;8:e41046. doi: 10.7554/eLife.41046 (PMC6467564; doi:10.7554/eLife.41046)
Supplement: Figure 3—source data 1. [file elife-41046-fig3-data1.xlsx]

## Sheet: Reaction stoichiometry
Abbrevation	Reaction stoichiometry (excluding charge and protons)	Reaction name
ac_EX	ac[e] <=>	Acetate exchange
co2tot_EX	co2tot[e] <=>	co2tot exchange
poscharge_EX	charge[e] <=>	positive charge exchange
etoh_EX	etoh[e] <=>	Ethanol exchange
glc-D_EX	glc-D[e] <=>	D-Glucose exchange
glyc_EX	glyc[e] <=>	Glycerol exchange
h_EX	h[e] <=>	H+ exchange
h2o_EX	h2o[e] <=>	H2O exchange
nh3_EX	nh3[e] <=>	NH3 exchange
o2_EX	o2[e] <=>	Oxygen exchange
pi_EX	pi[e] <=>	Orthophosphate exchange
pyr_EX	pyr[e] <=>	Pyruvate exchange
so4_EX	so4[e] <=>	Sulfate exchange
succ_EX	succ[e] <=>	Succinate exchange
gal-D_EX	gal[e] <=>	D-Galactose exchange
man-D_EX	man[e] <=>	D-Mannose exchange
gthox_EX	gthox[c] <=>	oxidized glutathione exchange
gthrd_EX	gthrd[c] <=>	reduced glutathione exchange
ASNS1	asp-L[c] + atp[c] + gln-L[c] + h2o[c] <=> amp[c] + asn-L[c] + glu-L[c] + ppi[c]	Asparagine synthase (glutamine-hydrolysing)
ASPK	asp-L[c] + atp[c] <=> 4pasp[c] + adp[c]	Aspartate kinase
ASPTA	akg[c] + asp-L[c] <=> glu-L[c] + oaa[c]	Aspartate transaminase
ASPTAm	akg[m] + asp-L[m] <=> glu-L[m] + oaa[m]	Aspartate transaminase, mitochondrial
ASAD	4pasp[c] + nadph[c] <=> aspsa[c] + nadp[c] + pi[c]	Aspartate-semialdehyde dehydrogenase
ALATA_L	glu-L[c] + pyr[c] <=> akg[c] + ala-L[c]	L-alanine transaminase
ALATA_Lm	glu-L[m] + pyr[m] <=> akg[m] + ala-L[m]	L-alanine transaminase, mitochondrial
GLCS2	h2o[c] + (4) udpg[c] <=> glycogen[c] + (4) udp[c]	glycogen synthase (UDPGlc)
PGMT	g1p[c] <=> g6p[c]	phosphoglucomutase
GALU	g1p[c] + utp[c] <=> udpg[c] + ppi[c]	UTP-glucose-1-phosphate uridylyltransferase
FBP	fdp[c] + h2o[c] <=> f6p[c] + pi[c]	Fructose-bisphosphatase
ICL	icit[c] <=> glx[c] + succ[c]	Isocitrate lyase
MALS	accoa[c] + glx[c] + h2o[c] <=> coa[c] + mal-L[c]	Malate synthase
MEm	h2o[m] + mal-L[m] + nadp[m] <=> co2tot[m] + nadph[m] + pyr[m]	Malic enzyme, mitochondrial
PPCK	atp[c] + h2o[c] + oaa[c] <=> adp[c] + co2tot[c] + pep[c]	Phosphoenolpyruvate carboxykinase
PC	atp[c] + co2tot[c] + pyr[c] <=> adp[c] + oaa[c] + pi[c]	Pyruvate carboxylase
ACGKm	acglu[m] + atp[m] <=> acg5p[m] + adp[m]	acetylglutamate kinase, mitochondrial
ACOTAm	acg5sa[m] + glu-L[m] <=> acorn[m] + akg[m]	acteylornithine transaminase, mitochondrial
ARGSL	argsuc[c] <=> arg-L[c] + fum[c]	argininosuccinate lyase
ARGSS	asp-L[c] + atp[c] + citr-L[c] <=> amp[c] + argsuc[c] + ppi[c]	argininosuccinate synthase, reversibl
CBPS	(2) atp[c] + co2tot[c] + gln-L[c] + h2o[c] <=> (2) adp[c] + cbp[c] + glu-L[c] + pi[c]	carbamoyl-phosphate synthase (glutamine-hydrolysing)
GLU5K	atp[c] + glu-L[c] <=> adp[c] + glu5p[c]	glutamate 5-kinase
G5P5	glu5p[c] + (2) nadph[c] <=> pro-L[c] + (2) nadp[c] + pi[c] + h2o[c]	glutamate-5-semialdehyde dehydrogenase/L-glutamate 5-semialdehyde dehydratase/Pyrroline-5-carboxylate reductase
AGPRm	acg5p[m] + nadph[m] <=> acg5sa[m] + nadp[m] + pi[m]	N-acetyl-g-glutamyl-phosphate reductase, mitochondrial
OCBT	cbp[c] + orn[c] <=> citr-L[c] + pi[c]	ornithine carbamoyltransferase
ORNTACm	acorn[m] + glu-L[m] <=> acglu[m] + orn[m]	ornithine transacetylase, mitochondrial
ampSYN1	(2) 10fthf[c] + (2) asp-L[c] + (6) atp[c] + co2tot[c] + (2) gln-L[c] + gly[c] + r5p[c] <=> (5) adp[c] + (2) amp[c] + (2) fum[c] + (2) glu-L[c] + (5) pi[c] + ppi[c] + (2) thf[c]	AMP synthesis
ampSYN2	10fthf[c] + asp-L[c] + atp[c] + gln-L[c] + prlp[c] <=> adp[c] + amp[c] + eig3p[c] + fum[c] + glu-L[c] + h2o[c] + pi[c] + thf[c]	AMP synthesis
cmpSYN	atp[c] + nh3[c] + ump[c] <=> adp[c] + cmp[c] + pi[c]	CMP synthesis
dampSYN	amp[c] + nadph[c] <=> damp[c] + h2o[c] + nadp[c]	dAMP synthesis
dcmpSYN	cmp[c] + nadph[c] <=> dcmp[c] + h2o[c] + nadp[c]	dCMP synthesis
dgmpSYN	gmp[c] + nadph[c] <=> dgmp[c] + h2o[c] + nadp[c]	dGMP synthesis
dtmpSYN	dcmp[c] + h2o[c] + mlthf[c] + nadph[c] <=> dtmp[c] + nadp[c] + nh3[c] + thf[c]	dTMP synthesis
ergstSYN	(2) atp[c] + met-L[c] + (3) nadph[c] + (2) o2[c] + zymst[c] <=> adp[c] + amp[c] + ergst[c] + (2) h2o[c] + hcys-L[c] + (3) nadp[c] + pi[c] + ppi[c]	Ergosterol synthesis
gmpSYN1	(2) 10fthf[c] + asp-L[c] + (6) atp[c] + co2tot[c] + (3) gln-L[c] + gly[c] + (2) h2o[c] + nad[c] + r5p[c] <=> (4) adp[c] + (2) amp[c] + fum[c] + (3) glu-L[c] + gmp[c] + nadh[c] + (4) pi[c] + (2) ppi[c] + (2) thf[c]	GMP synthesis
gmpSYN2	10fthf[c] + atp[c] + (2) gln-L[c] + h2o[c] + nad[c] + prlp[c] <=> amp[c] + eig3p[c] + (2) glu-L[c] + gmp[c] + nadh[c] + ppi[c] + thf[c]	GMP synthesis
umpSYN	asp-L[c] + (3) atp[c] + gln-L[c] + (0.5) o2[c] + r5p[c] <=> (2) adp[c] + amp[c] + glu-L[c] + (2) pi[c] + ppi[c] + ump[c]	UMP synthesis
zymstSYN	(18) accoa[c] + (18) atp[c] + h2o[c] + (26) nadph[c] + (2) nad[c] + (10) o2[c] <=> (18) adp[c] + (8) co2tot[c] + (18) coa[c] + for[c] + (2) nadh[c] + (26) nadp[c] + (6) pi[c] + (6) ppi[c] + zymst[c]	Zymosterol synthesis
ACONT	cit[c] <=> icit[c]	Aconitate hydratase
ACONTm	cit[m] <=> icit[m]	Aconitate hydratase, mitochondrial
AKGDm	akg[m] + coa[m] + h2o[m] + nad[m] <=> co2tot[m] + nadh[m] + succoa[m]	Oxoglutarate dehydrogenase, mitochondrial
CS	accoa[c] + h2o[c] + oaa[c] <=> cit[c] + coa[c]	citrate synthase
CSm	accoa[m] + h2o[m] + oaa[m] <=> cit[m] + coa[m]	citrate synthase, mitochondrial
ICDHxm	h2o[m] + icit[m] + nad[m] <=> akg[m] + co2tot[m] + nadh[m]	Isocitrate dehydrogenase (NAD+), mitochondrial
ICDHy	h2o[c] + icit[c] + nadp[c] <=> akg[c] + co2tot[c] + nadph[c]	isocitrate dehydrogenase (NADP)
ICDHym	h2o[m] + icit[m] + nadp[m] <=> akg[m] + co2tot[m] + nadph[m]	Isocitrate dehydrogenase (NADP+), mitochondrial
SUCOAS1m	atp[m] + coa[m] + succ[m] <=> adp[m] + pi[m] + succoa[m]	Succinate--CoA ligase (ADP-forming), mitochondrial
BPNT	h2o[c] + pap[c] <=> amp[c] + pi[c]	3',5'-bisphosphate nucleotidase
SO4SO3	so4[c] + (2) atp[c] + nadph[c] <=> so3[c] + pap[c] + nadp[c] + adp[c] + ppi[c]	sulfate adenylyltransferase/adenylyl-sulfate kinase/phosphoadenylyl-sulfate reductase (thioredoxin)
SULR	(3) h2o[c] + h2s[c] + (3) nadp[c] <=> (3) nadph[c] + so3[c]	sulfite reductase (NADPH2)
MTHFR3	mlthf[c] + nadph[c] <=> 5mthf[c] + nadp[c]	5,10-methylenetetrahydrofolatereductase (NADPH)
FTHFL	atp[c] + for[c] + thf[c] <=> 10fthf[c] + adp[c] + pi[c]	formate-tetrahydrofolate ligase
MTHFC	h2o[c] + methf[c] <=> 10fthf[c]	methenyltetrahydrofolate cyclohydrolase
MTHFD	mlthf[c] + nadp[c] <=> methf[c] + nadph[c]	methylenetetrahydrofolate dehydrogenase (NADP)
ANS	chor[c] + gln-L[c] <=> anth[c] + glu-L[c] + pyr[c]	anthranilate synthase
GLUDym	glu-L[m] + h2o[m] + nadp[m] <=> akg[m] + nadph[m] + nh3[m]	glutamate dehydrogenase (NADP)
GLUDy	glu-L[c] + h2o[c] + nadp[c] <=> akg[c] + nadph[c] + nh3[c]	glutamate dehydrogenase (NADP)
GLUSxm	akg[m] + gln-L[m] + nadh[m] <=> (2) glu-L[m] + nad[m]	glutamate synthase (NADH2), mitochondrial
GLNS	atp[c] + glu-L[c] + nh3[c] <=> adp[c] + gln-L[c] + pi[c]	glutamine synthetase
ALCD2m	etoh[m] + nad[m] <=> acald[m] + nadh[m]	alcohol dehydrogenase (ethanol), mitochondrial
GLYK	atp[c] + glyc[c] <=> adp[c] + glyc3p[c]	glycerol kinase
G3PT	glyc3p[c] + h2o[c] <=> glyc[c] + pi[c]	glycerol-3-phosphatase
G3PD1	dhap[c] + nadh[c] <=> glyc3p[c] + nad[c]	glycerol-3-phosphate dehydrogenase (NAD)
G3PD2	glyc3p[c] + q8[c] <=> dhap[c] + q8h2[c]	glycerol-3-phosphate dehydrogenase (Ubiquinone)
AGTm	ala-L[m] + glx[m] <=> gly[m] + pyr[m]	Alanine-glyoxylate transaminase, mitochondrial
CYSTS	hcys-L[c] + ser-L[c] <=> cyst-L[c] + h2o[c]	cystathionine beta-synthase
GHMT2	ser-L[c] + thf[c] <=> gly[c] + h2o[c] + mlthf[c]	glycine hydroxymethyltransferase
HSDy	aspsa[c] + nadph[c] <=> hom-L[c] + nadp[c]	homoserine dehydrogenase (NADP)
HSK	atp[c] + hom-L[c] <=> adp[c] + phom[c]	homoserine kinase
PGPS	3pg[c] + glu-L[c] + nad[c] + h2o[c] <=> ser-L[c] + akg[c] + nadh[c] + pi[c]	phosphoglycerate dehydrogenase/phosphoserine transaminase/phosphoserine phosphatase (L-serine)
ENO	2pg[c] <=> h2o[c] + pep[c]	Enolase
FBA	fdp[c] <=> dhap[c] + g3p[c]	Fructose-bisphosphate aldolase
PGI	g6p[c] <=> f6p[c]	glucose-6-phosphate isomerase
GAPD	g3p[c] + nad[c] + pi[c] <=> 13dpg[c] + nadh[c]	glyceraldehyde-3-phosphate dehydrogenase
PDHm	coa[m] + h2o[m] + nad[m] + pyr[m] <=> accoa[m] + co2tot[m] + nadh[m]	Glycolysis/Gluconeogenesis
HEX1	atp[c] + glc-D[c] <=> adp[c] + g6p[c]	hexokinase (D-glucose:ATP)
PFK	atp[c] + f6p[c] <=> adp[c] + fdp[c]	Phosphofructokinase
PGK	3pg[c] + atp[c] <=> 13dpg[c] + adp[c]	phosphoglycerate kinase
PGM	2pg[c] <=> 3pg[c]	phosphoglycerate mutase
PYK	adp[c] + pep[c] <=> atp[c] + pyr[c]	pyruvate kinase
TPI	dhap[c] <=> g3p[c]	triose-phosphate isomerase
PRMICIi	prfp[c] <=> prlp[c]	1-(5-phosphoribosyl)-5-[(5-phosphoribosylamino)methylideneamino)imidazole-4-carboxamide isomerase
ATPPRT	atp[c] + prpp[c] <=> ppi[c] + prbatp[c]	ATP phosphoribosyltransferase
HISTD	h2o[c] + histd[c] + (2) nad[c] <=> his-L[c] + (2) nadh[c]	histidinol dehydrogenase
HISTP	h2o[c] + hisp[c] <=> histd[c] + pi[c]	histidinol-phosphatase
HSTPT	glu-L[c] + imacp[c] <=> akg[c] + hisp[c]	histidinol-phosphate transaminase
IGPDH	eig3p[c] <=> h2o[c] + imacp[c]	imidazoleglycerol-phosphate dehydratase
PRATPAMPC	(2) h2o[c] + prbatp[c] <=> ppi[c] + prfp[c]	phosphoribosyl-ATP pyrophosphohydrolase / phosphoribosyl-AMP cyclohydrolase
PRPPS	atp[c] + r5p[c] <=> amp[c] + prpp[c]	phosphoribosylpyrophosphate synthetase
FDH	for[c] + h2o[c] + nad[c] <=> co2tot[c] + nadh[c]	formate dehydrogenase
METS	5mthf[c] + hcys-L[c] <=> met-L[c] + thf[c]	methionine synthase
CYSTGL	cyst-L[c] + h2o[c] <=> 2obut[c] + cys-L[c] + nh3[c]	cystathionine g-lyase
HSERTA	accoa[c] + hom-L[c] <=> achms[c] + coa[c]	homoserine O-trans-acetylase
AHSERL2	achms[c] + h2s[c] <=> ac[c] + hcys-L[c]	O-acetylhomoserine (thiol)-lyase
ADK1	amp[c] + atp[c] <=> (2) adp[c]	adenylate kinase
ADK1m	amp[m] + atp[m] <=> (2) adp[m]	adenylate kinase, mitochondrial
ATPHYD	atp[c] + h2o[c] <=> adp[c] + pi[c]	ATP hydrolysis
NDPK2	udp[c] + atp[c] <=> utp[c] + adp[c]	nucleoside-diphosphate kinase (ATP:UDP)
NADH2-u6i	nadh[c] + q8[c] <=> nad[c] + q8h2[c]	NADH dehydrogenase, external
FUM	fum[c] + h2o[c] <=> mal-L[c]	fumarase
FUMm	fum[m] + h2o[m] <=> mal-L[m]	fumarase, mitochondrial
PPA	h2o[c] + ppi[c] <=> (2) pi[c]	inorganic diphosphatase
PPAm	h2o[m] + ppi[m] <=> (2) pi[m]	inorganic diphosphatase, mitochondrial
MDH	mal-L[c] + nad[c] <=> nadh[c] + oaa[c]	malate dehydrogenase
MDHm	mal-L[m] + nad[m] <=> nadh[m] + oaa[m]	malate dehydrogenase, mitochondrial
PGL	6pgl[c] + h2o[c] <=> 6pgc[c]	6-phosphogluconolactonase
G6PDH2	g6p[c] + nadp[c] <=> 6pgl[c] + nadph[c]	glucose 6-phosphate dehydrogenase
GND	6pgc[c] + h2o[c] + nadp[c] <=> co2tot[c] + nadph[c] + ru5p-D[c]	phosphogluconate dehydrogenase
RPI	r5p[c] <=> ru5p-D[c]	ribose-5-phosphate isomerase
RPE	ru5p-D[c] <=> xu5p-D[c]	ribulose 5-phosphate 3-epimerase
TALA	g3p[c] + s7p[c] <=> e4p[c] + f6p[c]	transaldolase
TKT2	e4p[c] + xu5p-D[c] <=> f6p[c] + g3p[c]	transketolase
TKT1	r5p[c] + xu5p-D[c] <=> g3p[c] + s7p[c]	transketolase
ACOAH	ac[c] + coa[c] <=> accoa[c] + h2o[c]	acetyl-CoA hydrolase
ACS	ac[c] + atp[c] + coa[c] <=> accoa[c] + amp[c] + ppi[c]	acetyl-CoA synthetase
ACSm	ac[m] + atp[m] + coa[m] <=> accoa[m] + amp[m] + ppi[m]	acetyl-CoA synthetase, mitochondrial
ALCD2x	etoh[c] + nad[c] <=> acald[c] + nadh[c]	alcohol dehydrogenase (ethanol)
HCITSm	accoa[m] + akg[m] + h2o[m] <=> coa[m] + hcit[m]	Homocitrate synthase
PYRDC	h2o[c] + pyr[c] <=> acald[c] + co2tot[c]	pyruvate decarboxylase
AATA	aka[c] + glu-L[c] <=> akg[c] + L2aadp[c]	2-aminoadipate transaminase
MCITDm	hcit[m] <=> b124tc[m] + h2o[m]	2-methylcitrate dehydratase, mitochondrial
HACNHm	b124tc[m] + h2o[m] <=> hicit[m]	homoacontinate hydratase, mitochondrial
HICITDm	hicit[m] + nad[m] <=> nadh[m] + oxag[m]	homoisocitrate dehydrogenase, mitochondrial
AASAD1	atp[c] + L2aadp[c] + nadph[c] <=> amp[c] + L2aadp6sa[c] + nadp[c] + ppi[c]	L-aminoadipate-semialdehyde dehydrogenase (NADPH)
THRD_Lm	thr-L[m] <=> 2obut[m] + nh3[m]	L-threonine deaminase, mitochondrial
OXAGm	h2o[m] + oxag[m] <=> aka[m] + co2tot[m]	non-enzymatic reaction, mitochondrial
SACCD2	h2o[c] + nad[c] + saccrp-L[c] <=> akg[c] + lys-L[c] + nadh[c]	saccharopine dehydrogenase (NAD, L-lysine forming)
SACCD1	glu-L[c] + L2aadp6sa[c] + nadph[c] <=> h2o[c] + nadp[c] + saccrp-L[c]	saccharopine dehydrogenase (NADP, L-glutamate forming)
THRA	acald[c] + gly[c] <=> thr-L[c]	Threonine aldolase
THRS	h2o[c] + phom[c] <=> pi[c] + thr-L[c]	threonine synthase
DHQT	3dhq[c] <=> 3dhsk[c] + h2o[c]	3-dehydroquinate dehydratase
DHQS	2dda7p[c] <=> 3dhq[c] + pi[c]	3-dehydroquinate synthase
DDPA	e4p[c] + h2o[c] + pep[c] <=> 2dda7p[c] + pi[c]	3-deoxy-D-arabino-heptulosonate 7-phosphate synthetase
PSCVTi	pep[c] + skm5p[c] <=> 3psme[c] + pi[c]	3-phosphoshikimate 1-carboxyvinyltransferase
ALDD2y	acald[c] + h2o[c] + nadp[c] <=> ac[c] + nadph[c]	aldehyde dehydrogenase (acetaldehyde, NADP)
ALDD2xm	acald[m] + h2o[m] + nad[m] <=> ac[m] + nadh[m]	aldehyde dehydrogenase (acetylaldehyde, NAD), mitochondrial
ALDD2ym	acald[m] + h2o[m] + nadp[m] <=> ac[m] + nadph[m]	aldehyde dehydrogenase (acetylaldehyde, NADP), mitochondrial
ANPRT	anth[c] + prpp[c] <=> ppi[c] + pran[c]	anthranilate phosphoribosyltransferase
CHORM	chor[c] <=> pphn[c]	chorismate mutase
CHORS	3psme[c] <=> chor[c] + pi[c]	chorismate synthase
IGPS	2cpr5p[c] <=> 3ig3p[c] + co2tot[c]	indole-3-glycerol-phosphate synthase
PHETA1	akg[c] + phe-L[c] <=> glu-L[c] + phpyr[c]	phenylalanine transaminase
PRAIi	pran[c] <=> 2cpr5p[c]	phosphoribosylanthranilate isomerase
PPNDH	pphn[c] <=> co2tot[c] + phpyr[c]	prephenate dehydratase
PPND2	h2o[c] + nadp[c] + pphn[c] <=> 34hpp[c] + co2tot[c] + nadph[c]	prephenate dehydrogenase (NADP)
SHK3D	3dhsk[c] + nadph[c] <=> nadp[c] + skm[c]	shikimate dehydrogenase
SHKK	atp[c] + skm[c] <=> adp[c] + skm5p[c]	shikimate kinase
TRPS1	3ig3p[c] + ser-L[c] <=> g3p[c] + h2o[c] + trp-L[c]	tryptophan synthase (indoleglycerol phosphate)
TYRTA	akg[c] + tyr-L[c] <=> 34hpp[c] + glu-L[c]	tyrosine transaminase
ACHBSm	2obut[m] + h2o[m] + pyr[m] <=> 2ahbut[m] + co2tot[m]	2-aceto-2-hydroxybutanoate synthase, mitochondrial
IPPMIb	2ippm[c] + h2o[c] <=> 3c3hmp[c]	2-isopropylmalate hydratase
IPPS	3mob[c] + accoa[c] + h2o[c] <=> 3c3hmp[c] + coa[c]	2-isopropylmalate synthase
OMCDC	3c4mop[c] + h2o[c] <=> 4mop[c] + co2tot[c]	2-Oxo-4-methyl-3-carboxypentanoate decarboxylation
IPPMIa	3c2hmp[c] <=> 2ippm[c] + h2o[c]	3-isopropylmalate dehydratase
IPMD	3c2hmp[c] + nad[c] <=> 3c4mop[c] + nadh[c]	3-isopropylmalate dehydrogenase
KARA1m	alac-S[m] + nadph[m] <=> 23dhmb[m] + nadp[m]	acetohydroxy acid isomeroreductase, mitochondrial
ACLSm	h2o[m] + (2) pyr[m] <=> alac-S[m] + co2tot[m]	acetolactate synthase, mitochondrial
DHAD1m	23dhmb[m] <=> 3mob[m] + h2o[m]	dihydroxy-acid dehydratase (2,3-dihydroxy-3-methylbutanoate), mitochondrial
DHAD2m	23dhmp[m] <=> 3mop[m] + h2o[m]	dihydroxy-acid dehydratase (2,3-dihydroxy-3-methylpentanoate), mitochondrial
ILETA	akg[c] + ile-L[c] <=> 3mop[c] + glu-L[c]	isoleucine transaminase
KARA2m	2ahbut[m] + nadph[m] <=> 23dhmp[m] + nadp[m]	ketol-acid reductoisomerase (2-Aceto-2-hydroxybutanoate), mitochondrial
LEUTA	akg[c] + leu-L[c] <=> 4mop[c] + glu-L[c]	leucine transaminase
VALTA	akg[c] + val-L[c] <=> 3mob[c] + glu-L[c]	valine transaminase
Galkin	gal[c] + atp[c] <=> adp[c] + gal1p[c]	Galactokinase
Gal7	udpg[c] + gal1p[c] <=> g1p[c] + udpgal[c]	UDP-glucose—hexose-1-phosphate uridylyltransferase
Gal10	udpgal[c] <=> udpg[c]	UDP-glucose-4-epimerase
Mankin	man[c] + atp[c] <=> adp[c] + man6p[c]	Mannokinase
M6pism	man6p[c] <=> f6p[c]	Mannose 6-phosphate isomerase
Tps1	udpg[c] + g6p[c] <=> tre6p[c] + udp[c]	trehalose synthase
Tps2	tre6p[c] + h2o[c] <=> tre[c] + pi[c]	trehalose synthase
Trha	tre[c] + h2o[c] <=> (2) glc-D[c]
GLCdeg	glycogen[c] + (2) h2o[c] + pi[c] <=> g1p[c] + (3) glc-D[c]	Glycogen degradation
DAK	dhap[c] + adp[c] <=> atp[c] + dha[c]	Dihydroxyacetone kinase
GCY1	dha[c] + nadph[c] <=> glyc[c] + nadp[c]	Glycerol dehydrogenase
ROS1	nadh[c] + gthox[c] <=> nad[c] + (2) gthrd[c]
ROS2	nadph[c] + gthox[c] <=> nadp[c] + (2) gthrd[c]
NADH2-u6m	nadh[m] + q8[c] <=> nad[m] + q8h2[c]	NADH dehydrogenase mitochondrial
ComplexII	q8[c] + succ[m] <=> fum[m] + q8h2[c]	succinate dehydrogenase, mitochondrial
ComplexIII	(2) ficytc[c] + q8h2[c] <=> (2) focytc[c] + q8[c]	ubiquinol-6 cytochrome c reductase
ComplexIV	(2) focytc[c] + (0.5) o2[m] <=> (2) ficytc[c] + h2o[m]	cytochrome c oxidase, mitochondrial
ATPS3m	(3) adp[m] + (3) pi[m] <=> (3) atp[m] + (3) h2o[m]	ATP synthase, mitochondrial
ATPASE	atp[c] + h2o[c] <=> adp[c] + pi[c]	ATPase
POSQt		charge transport
POSQtm		charge transport, mitochondrial
Ht		proton leak
Htm		proton leak, mitochondrial
IONPUMP	atp[c] + h2o[c] <=> adp[c] + pi[c]	ATPase
IONPUMPm	atp[m] + h2o[m] <=> adp[m] + pi[m]	ATPase
ACt-1	ac[e] <=> ac[c]	acetate transport
ACt-1+H	ac[e] <=> ac[c]	acetate transport
CO2t-1	co2tot[e] <=> co2tot[c]	CO2 transport
CO2t-1+H	co2tot[e] <=> co2tot[c]	CO2 transport
ETOHt+0	etoh[e] <=> etoh[c]	ethanol transport
GLCt+0	glc-D[e] <=> glc-D[c]	glucose transport
GLYCt+0	glyc[c] <=> glyc[e]	glycerol transport
H2Ot+0	h2o[e] <=> h2o[c]	H2O transport
NH3t+1	nh3[e] <=> nh3[c]	NH3 transport
NH3t+1-H	nh3[e] <=> nh3[c]	NH3 transport
O2t	o2[e] <=> o2[c]	O2 transport
PIt-1	pi[e] <=> pi[c]	phosphate transport
PIt-1+H	pi[e] <=> pi[c]	phosphate transport
PYRt-1	pyr[e] <=> pyr[c]	pyruvate transport
PYRt-1+H	pyr[e] <=> pyr[c]	pyruvate transport
SO4t-2+2H	so4[e] <=> so4[c]	sulfate transport
SO4t-2+H	so4[e] <=> so4[c]	sulfate transport
SO4t-2	so4[e] <=> so4[c]	sulfate transport
SUCCt-2+2H	succ[e] <=> succ[c]	succinate transport
SUCCt-2+H	succ[e] <=> succ[c]	succinate transport
SUCCt-2	succ[e] <=> succ[c]	succinate transport
2OBUTtm-1	2obut[c] <=> 2obut[m]
2OBUTtm-1+H	2obut[c] <=> 2obut[m]
2OXOADPAKGtm-2-2	aka[m] + akg[c] <=> aka[c] + akg[m]	2-oxodicarboxylate transporter, mitochondrial
3MOBtm-1	3mob[c] <=> 3mob[m]	3-methyl-2-oxobutanoate transport, mitochondrial
3MOBtm-1+H	3mob[c] <=> 3mob[m]	3-methyl-2-oxobutanoate transport, mitochondrial
3MOPtm-1	3mop[c] <=> 3mop[m]	3-Methyl-2-oxopentanoate transport, mitochondrial
3MOPtm-1+H	3mop[c] <=> 3mop[m]	3-Methyl-2-oxopentanoate transport, mitochondrial
ACtm-1	ac[c] <=> ac[m]	acetate transport, mitochondrial
ACtm-1+H	ac[c] <=> ac[m]	acetate transport, mitochondrial
ACALDtm+0	acald[c] <=> acald[m]	indole-3-acetaldehyde transport, mitochondrial
ALAtm+0	ala-L[c] <=> ala-L[m]
ADPATPtm-4-2	adp[c] + atp[m] <=> adp[m] + atp[c]	ADP/ATP transporter, mitochondrial
ADPATPtm-4-3	adp[c] + atp[m] <=> adp[m] + atp[c]	ADP/ATP transporter, mitochondrial
AKGMALtm-2-2	akg[c] + mal-L[m] <=> akg[m] + mal-L[c]
ASPGLUtm-1-1	asp-L[c] + glu-L[m] <=> asp-L[m] + glu-L[c]
CITICITtm-3-3	cit[c] + icit[m] <=> cit[m] + icit[c]	citrate transport, mitochondrial
CITMALtm-3-2	cit[c] + mal-L[m] <=> cit[m] + mal-L[c]	citrate transport, mitochondrial
CITMALtm-3+H-2	cit[c] + mal-L[m] <=> cit[m] + mal-L[c]	citrate transport, mitochondrial
CO2tm-1	co2tot[c] <=> co2tot[m]	CO2 transport, mitochondrial
CO2tm-1+H	co2tot[c] <=> co2tot[m]	CO2 transport, mitochondrial
ETOHtm+0	etoh[c] <=> etoh[m]	ethanol transport, mitochondrial
GLNtm+0	gln-L[c] <=> gln-L[m]
GLUtm-1	glu-L[c] <=> glu-L[m]	L-glutamate transport, mitochondrial
GLUtm-1+H	glu-L[c] <=> glu-L[m]	L-glutamate transport, mitochondrial
GLYtm+0	gly[c] <=> gly[m]	glycine transport, mitochondrial
GLXtm-1	glx[c] <=> glx[m]
GLXtm-1+H	glx[c] <=> glx[m]
H2Otm+0	h2o[c] <=> h2o[m]	H2O transport, mitochondrial
MALPItm-2-2	mal-L[c] + pi[m] <=> mal-L[m] + pi[c]	malate transport, mitochondrial
NH3tm+1	nh3[c] <=> nh3[m]	NH3 transport, mitochondrial
NH3tm+1-H	nh3[c] <=> nh3[m]	NH3 transport, mitochondrial
O2tm+0	o2[c] <=> o2[m]	O2 transport, mitochondrial
OAAtm-2+2H	oaa[c] <=> oaa[m]	oxaloacetate transport, mitochondrial
OAAtm-2+H	oaa[c] <=> oaa[m]	oxaloacetate transport, mitochondrial
OAAtm-2	oaa[c] <=> oaa[m]	oxaloacetate transport, mitochondrial
ORNtm+1	orn[c] <=> orn[m]	ornithine transport, mitochondrial
ORNtm+1-H	orn[c] <=> orn[m]	ornithine transport, mitochondrial
PItm-2+2H	pi[c] <=> pi[m]	phosphate transporter, mitochondrial
PItm-2+H	pi[c] <=> pi[m]	phosphate transporter, mitochondrial
PItm-2	pi[c] <=> pi[m]	phosphate transporter, mitochondrial
PYRtm-1	pyr[c] <=> pyr[m]	pyruvate transport, mitochondrial
PYRtm-1+H	pyr[c] <=> pyr[m]	pyruvate transport, mitochondrial
SUCCPItm-2-2	pi[m] + succ[c] <=> pi[c] + succ[m]	succinate transport, mitochondrial
SUCFUMtm-2-2	fum[m] + succ[c] <=> fum[c] + succ[m]	succinate-fumarate antiport, mitochondrial
THRtm+0	thr-L[c] <=> thr-L[m]	threonine transport, mitochondrial
GALt+0	gal[e] <=> gal[c]	galactose transport
Mant+0	man[e] <=> man[c]	mannose transport

## Sheet: Metabolites
Abbrevation	Metabolite name
10fthf	10-Formyltetrahydrofolate
13dpg	3-Phospho-D-glyceroyl phosphate
23dhmb	(R)-2,3-Dihydroxy-3-methylbutanoate
23dhmp	(R)-2,3-Dihydroxy-3-methylpentanoate
2ahbut	(S)-2-Aceto-2-hydroxybutanoate
2cpr5p	1-(2-Carboxyphenylamino)-1-deoxy-D-ribulose 5-phosphate
2dda7p	2-Dehydro-3-deoxy-D-arabino-heptonate 7-phosphate
2ippm	2-Isopropylmaleate
2obut	2-Oxobutanoate
aka	2-Oxoadipate
2pg	2-Phospho-D-glycerate
34hpp	3-(4-Hydroxyphenyl)pyruvate
3c2hmp	(2R,3S)-3-Isopropylmalate
3c3hmp	alpha-Isopropylmalate
3c4mop	(2S)-2-Isopropyl-3-oxosuccinate
3dhq	3-Dehydroquinate
3dhsk	3-Dehydroshikimate
3ig3p	Indoleglycerol phosphate
3mob	3-Methyl-2-oxobutanoic acid
3mop	(S)-3-Methyl-2-oxopentanoic acid
3pg	3-Phospho-D-glycerate
3psme	5-O-(1-Carboxyvinyl)-3-phosphoshikimate
4mop	4-Methyl-2-oxopentanoate
4pasp	4-Phospho-L-aspartate
5mthf	5-Methyltetrahydrofolate
6pgc	6-Phospho-D-gluconate
6pgl	D-Glucono-1,5-lactone 6-phosphate
ac	Acetate
acald	Acetaldehyde
accoa	Acetyl-CoA
acg5p	N-Acetyl-L-glutamate 5-phosphate
acg5sa	N-Acetyl-L-glutamate 5-semialdehyde
acglu	N-Acetyl-L-glutamate
achms	O-Acetyl-L-homoserine
acorn	N-Acetylornithine
adp	ADP
akg	2-Oxoglutarate
alac-S	(S)-2-Acetolactate
ala-L	L-Alanine
amp	AMP
anth	Anthranilate
arg-L	L-Arginine
argsuc	N-(L-Arginino)succinate
asn-L	L-Asparagine
asp-L	L-Aspartate
aspsa	L-Aspartate 4-semialdehyde
atp	ATP
b124tc	(Z)-But-1-ene-1,2,4-tricarboxylate
cbp	Carbamoyl phosphate
charge	unspecific charge
chor	Chorismate
cit	Citrate
citr-L	L-Citrulline
cmp	CMP
co2tot	HCO3-
coa	CoA
q8	Ubiquinone
q8h2	Ubiquinol
cys-L	L-Cysteine
cyst-L	L-Cystathionine
damp	dAMP
dcmp	dCMP
dgmp	dGMP
dhap	Glycerone phosphate
dtmp	dTMP
e4p	D-Erythrose 4-phosphate
eig3p	D-erythro-1-(Imidazol-4-yl)glycerol 3-phosphate
ergst	Ergosterol
etoh	Ethanol
f6p	D-Fructose 6-phosphate
fdp	D-Fructose 1,6-bisphosphate
ficytc	Ferricytochrome c
focytc	Ferrocytochrome c
for	Formate
fum	Fumarate
g1p	D-Glucose 1-phosphate
g3p	D-Glyceraldehyde 3-phosphate
g6p	D-Glucose 6-phosphate
glc-D	D-Glucose
gln-L	L-Glutamine
glu5p	L-Glutamyl 5-phosphate
glu-L	L-Glutamate
glx	Glyoxylate
gly	Glycine
glyc	Glycerol
glyc3p	sn-Glycerol 3-phosphate
glycogen	Glycogen
gmp	GMP
h	H+
h2o	H2O
h2s	Hydrogen sulfide
hcit	(R)-2-Hydroxybutane-1,2,4-tricarboxylate
hcys-L	L-Homocysteine
hicit	Homoisocitrate
his-L	L-Histidine
hisp	L-Histidinol phosphate
histd	L-Histidinol
hom-L	L-Homoserine
icit	Isocitrate
ile-L	L-Isoleucine
imacp	3-(Imidazol-4-yl)-2-oxopropyl phosphate
L2aadp	L-2-Aminoadipate
L2aadp6sa	L-2-Aminoadipate 6-semialdehyde
leu-L	L-Leucine
lys-L	L-Lysine
mal-L	(S)-Malate
methf	5,10-Methenyltetrahydrofolate
met-L	L-Methionine
mlthf	5,10-Methylenetetrahydrofolate
nad	NAD+
nadh	NADH
nadp	NADP+
nadph	NADPH
nh3	NH3
o2	Oxygen
oaa	Oxaloacetate
orn	L-Ornithine
oxag	Oxaloglutarate
pap	Adenosine 3',5'-bisphosphate
pep	Phosphoenolpyruvate
phe-L	L-Phenylalanine
phom	O-Phospho-L-homoserine
phpyr	Phenylpyruvate
pi	Orthophosphate
pphn	Prephenate
ppi	Diphosphate
pran	N-(5-Phospho-D-ribosyl)anthranilate
prbatp	1-(5-Phospho-D-ribosyl)-ATP
prfp	5-(5-Phospho-D-ribosylaminoformimino)-1-(5-phosphoribosyl)-imidazole-4-carboxamide
prlp	N-(5'-Phospho-D-1'-ribulosylformimino)-5-amino-1-(5''-phospho-D-ribosyl)-4-imidazolecarboxamide
pro-L	L-Proline
prpp	5-Phospho-alpha-D-ribose 1-diphosphate
pyr	Pyruvate
r5p	alpha-D-Ribose 5-phosphate
ru5p-D	D-Ribulose 5-phosphate
s7p	Sedoheptulose 7-phosphate
saccrp-L	N6-(L-1,3-Dicarboxypropyl)-L-lysine
ser-L	L-Serine
skm	Shikimate
skm5p	Shikimate 5-phosphate
so3	Sulfite
so4	Sulfate
succ	Succinate
succoa	Succinyl-CoA
thf	Tetrahydrofolate
thr-L	L-Threonine
tre	alpha,alpha-Trehalose
trp-L	L-Tryptophan
tyr-L	L-Tyrosine
udp	UDP
udpg	UDP-glucose
ump	UMP
utp	UTP
val-L	L-Valine
xu5p-D	D-Xylulose 5-phosphate
zymst	Zymosterol
gal	D-galactose
gal1p	D-galactose 1-phosphate
udpgal	UDP-galactose
man	D-mannose
man6p	mannose 6-phosphate
tre6p	trehalose 6-phosphate
electron
dha	dihydroxyacetone
gthox	Oxidized glutathione
gthrd	Reduced glutathione

## Sheet: Intracellular flux distribution
	Predicted intracellular flux distribution normalized to glucose uptake rate [mol-1 mol-1glc]
	Mother 0 h	Mother 10 h	Mother 20 h	Mother 44 h	Mother 68 h
fum		0.00947063	-0.454862	0.000763142	6.76001e-05
FBP
ICL		-2.26533e-23	-0.46129	0.000134456	0.000286191
MALS		-2.26533e-23			0.000286191
MEm	0.0164407	0.0231179	0.100129	0.00265205
PPCK
PC	0.0767425	0.0632126	0.127343	0.00665192
ACONT	0.0362259			1.01614	0.000441043
ACONTm	-3.01926e-15	0.0298201	0.111183		0.680523
AKGDm	0.00493557	0.00406282	0.55499	1.01393	0.680494
CS	0.0362259				8.72522e-05
CSm		0.0298201	0.111183	1.01614	0.680876
ICDHxm		0.0298201	0.111183		0.6803
ICDHy	0.0362259	2.26533e-23	0.46129	1.01601	0.000154852
ICDHym	-3.01926e-15				0.000223012
SUCOAS1m	-0.00493557	-0.00406282	-0.55499	-1.01393	-0.680494
ENO	1.63031	1.67499	0.990989	1.11362	0.293644
FBA	0.870026	0.877903	0.628312	0.662113	0.330094
PGI	0.816021	0.803235			-1.00851
GAPD	1.64938	1.70024	1.46941	1.11475	0.293824
PDHm	0.00879005	0.0370558	0.116094	1.01672	0.303146
HEX1	1	1	1	1	1
PFK	0.870026	0.877903	0.628312	0.662113	0.330094
PGK	-1.64938	-1.70024	-1.46941	-1.11475	-0.293824
PGM	-1.63031	-1.67499	-0.990989	-1.11362	-0.293644
PYK	1.61408	1.66163	0.981918	1.11255	0.293549
TPI	0.743135	0.777411	0.521794	0.120972	-0.705625
FUMm	0.0164407	0.00406282	0.55499	1.01407	0.68078
MDH	3.01927e-15			1.01218
MDHm	-3.01926e-15	-0.0095844			0.681134
PGL	0.131601	0.153649	0.970735	0.996526	2.0082
G6PDH2	0.131601	0.153649	0.970735	0.996526	2.0082
GND	0.131601	0.153649	0.970735	0.996526	2.0082
RPI	-0.052783	-0.0585556	-0.32856	-0.332767	-0.669452
RPE	0.0788181	0.0950931	0.642175	0.663759	1.33875
TALA	0.0434678	0.0508875	0.323355	0.332149	0.669397
TKT2	0.0353503	0.0442055	0.31882	0.33161	0.66935
TKT1	0.0434678	0.0508875	0.323355	0.332149	0.669397
ACOAH	-5.68434e-14	-5.68434e-14		-5.68434e-14	-1.1628e-13
ACS	0.0622368	0.0214113	0.0145328	0.00172532	0.000526274
ACSm					0.377782
PYRDC	1.48584	1.53284	0.803007	0.102175	7.69305e-14
ALDD2y	0.0643253	0.0946159	0.318023	0.689607	0.991767
ALDD2xm					0.377782
ALDD2ym	0.0116433
Trha		6.49136e-34
GLCdeg					1.73674e-15
ComplexII	0.00493557	0.00406282	0.0937004	1.01407	0.68078
ac_EX	0.0154917	0.0746532	0.304474	0.687999	0.991251
co2tot_EX	1.65094	1.76297	3.48235	4.14414	3.67284
etoh_EX	1.40988	1.42868	0.478506	-0.587433	-1.36962
glc-D_EX	-1	-1	-1	-1	-1
glyc_EX	0.126132	0.0998675	0.106094	0.541091	1.03571
o2_EX	-0.0406672	-0.0617613	-1.07294	-1.64081	-1.70186
pyr_EX	0.00554218	0.00752228	0.00565695	-0.0139089	-0.00991215
succ_EX
biomass	0.030713	0.025282	0.01716	0.00203722	0.00018046
histd	0.00203627	0.0016762	0.00113771	0.000135068	1.19645e-05
ASNS1	0.00312351	0.00257118	0.00174517	0.000207185	1.83527e-05
ASPK	0.013354	0.00144866	0.000983268	0.000885782	1.03403e-05
ASPTA	-0.0405165	-0.023808	-0.0161596	-0.0026875	-0.000169939
ASPTAm
ASAD	0.013354	0.00144866	0.000983268	0.000885782	1.03403e-05
ALATA_L	0.0140911	0.0115994		0.000934676	8.27948e-05
ALATA_Lm			-0.453417	0.000134456
GLCS2	0.00398117	0.00327718	0.00222436	0.000264074	2.33921e-05
PGMT	-0.0166434	-0.0137003	-0.009299	-0.00110397	-9.7791e-05
GALU	0.0166434	0.0137003	0.009299	0.00110397	9.7791e-05
ACGKm	0.00493557	0.00406282	0.00275761	0.000327381	2.89998e-05
ACOTAm	0.00493557	0.00406282	0.00275761	0.000327381	2.89998e-05
ARGSL	0.00493557	0.00406282	0.00275761	0.000327381	2.89998e-05
ARGSS	0.00493557	0.00406282	0.00275761	0.000327381	2.89998e-05
CBPS	0.00493557	0.00406282	0.00275761	0.000327381	2.89998e-05
GLU5K	0.00505843	0.00416394	0.00282625	0.00033553	2.97217e-05
G5P5	0.00505843	0.00416394	0.00282625	0.00033553	2.97217e-05
AGPRm	0.00493557	0.00406282	0.00275761	0.000327381	2.89998e-05
OCBT	0.00493557	0.00406282	0.00275761	0.000327381	2.89998e-05
ORNTACm	0.00493557	0.00406282	0.00275761	0.000327381	2.89998e-05
ampSYN1	0.00152336	0.00125399	0.000851136	0.000101046	8.95079e-06
ampSYN2	0.00203627	0.0016762	0.00113771	0.000135068	1.19645e-05
cmpSYN	0.00155715	0.0012818	0.000870012	0.000103287	9.1493e-06
dampSYN	0.000110567	9.10152e-05	6.1776e-05	7.33399e-06	6.49654e-07
dcmpSYN	0.000184278	0.000151692	0.00010296	1.22233e-05	1.08276e-06
dgmpSYN	7.37111e-05	6.06768e-05	4.1184e-05	4.88932e-06	4.33103e-07
dtmpSYN	0.000110567	9.10152e-05	6.1776e-05	7.33399e-06	6.49654e-07
ergstSYN	2.14991e-05	1.76974e-05	1.2012e-05	1.42605e-06	1.26322e-07
gmpSYN1	0.00148651	0.00122365	0.000830544	9.86014e-05	8.73424e-06
gmpSYN2
umpSYN	0.00339685	0.00279619	0.0018979	0.000225316	1.99588e-05
zymstSYN	6.75685e-05	5.56204e-05	3.7752e-05	4.48188e-06	3.97011e-07
BPNT	0.00175985	0.00144866	0.000983268	0.000116733	1.03403e-05
SO4SO3	0.00175985	0.00144866	0.000983268	0.000116733	1.03403e-05
SULR	-0.00175985	-0.00144866	-0.000983268	-0.000116733	-1.03403e-05
MTHFR3	0.00173528	0.00142843	0.00096954	0.000115103	1.0196e-05
FTHFL	-0.00202706	-0.0112126	-0.4689		-8.00338e-05
MTHFC	0.0100831	0.017844	0.473401	0.000534362	0.000127368
MTHFD	0.0100831	0.017844	0.473401	0.000534362	0.000127368
ANS	0.000872248	0.000718008	0.000487344	5.7857e-05	5.12505e-06
GLUDym			-0.0844375	-0.000789218	-5.79997e-05
GLUDy	-0.151126	-0.12034		-0.00923512	-0.000829969
GLUSxm		0.00406282
GLNS	0.0251079	0.0247308	0.0140283	0.00166543	0.000147526
ALCD2m
GLYK					-1.03571
G3PT		0.0998675	0.106094	0.541091
G3PD1	0.00075861	0.100492	0.106518	0.541142	1.03572
G3PD2
AGTm			-0.46129	0.000134456
CYSTS	0.000202706	0.000166861	0.000113256	1.34456e-05	1.19103e-06
GHMT2	0.0119289	0.0193635	0.474433	0.000656799	0.000138214
HSDy	0.013354	0.00144866	0.000983268	0.000885782	1.03403e-05
HSK	0.0115941			0.00076905
PGPS	0.0190728	0.0252441	0.478424	0.00113066	0.000180189
PRMICIi	0.00203627	0.0016762	0.00113771	0.000135068	1.19645e-05
ATPPRT	0.00203627	0.0016762	0.00113771	0.000135068	1.19645e-05
HISTP	0.00203627	0.0016762	0.00113771	0.000135068	1.19645e-05
HSTPT	0.00203627	0.0016762	0.00113771	0.000135068	1.19645e-05
IGPDH	0.00203627	0.0016762	0.00113771	0.000135068	1.19645e-05
PRATPAMPC	0.00203627	0.0016762	0.00113771	0.000135068	1.19645e-05
PRPPS	0.00290852	0.0023942	0.00162505	0.000192925	1.70895e-05
FDH	0.00209462	0.0112682	0.468938	4.48188e-06	8.04308e-05
METS	0.00173528	0.00142843	0.00096954	0.000115103	1.0196e-05
CYSTGL	0.000202706	0.000166861	0.000113256	1.34456e-05	1.19103e-06
HSERTA	0.00175985	0.00144866	0.000983268	0.000116733	1.03403e-05
AHSERL2	0.00175985	0.00144866	0.000983268	0.000116733	1.03403e-05
ADK1	0.0938619	0.0474442	0.0322024	0.00382304	0.000712093
ADK1m					0.377782
ATPHYD
NDPK2	0.0166434	0.0137003	0.009299	0.00110397	9.7791e-05
NADH2-u6i	0.0470194	0.0492826	1.26117	0.235868
PPA	0.171114	0.111036	0.075365	0.00894726	0.001166
PPAm					0.377782
ALCD2x	-1.40988	-1.42868	-0.478506	0.587433	1.36962
HCITSm	0.00879005	0.00723571	0.00491119	0.000583052	5.16475e-05
AATA	0.00879005	0.00723571	0.00491119	0.000583052	5.16475e-05
MCITDm	0.00879005	0.00723571	0.00491119	0.000583052	5.16475e-05
HACNHm	0.00879005	0.00723571	0.00491119	0.000583052	5.16475e-05
HICITDm	0.00879005	0.00723571	0.00491119	0.000583052	5.16475e-05
AASAD1	0.00879005	0.00723571	0.00491119	0.000583052	5.16475e-05
THRD_Lm	0.00571568	0.00470498	0.00319347	0.000379126	3.35835e-05
OXAGm	0.00879005	0.00723571	0.00491119	0.000583052	5.16475e-05
SACCD2	0.00879005	0.00723571	0.00491119	0.000583052	5.16475e-05
SACCD1	0.00879005	0.00723571	0.00491119	0.000583052	5.16475e-05
THRA		0.00954395	0.0064779		6.81235e-05
THRS	0.0115941			0.00076905
DHQT	0.00811744	0.00668203	0.00453539	0.000538437	4.76955e-05
DHQS	0.00811744	0.00668203	0.00453539	0.000538437	4.76955e-05
DDPA	0.00811744	0.00668203	0.00453539	0.000538437	4.76955e-05
PSCVTi	0.00811744	0.00668203	0.00453539	0.000538437	4.76955e-05
ANPRT	0.000872248	0.000718008	0.000487344	5.7857e-05	5.12505e-06
CHORM	0.00724519	0.00596402	0.00404804	0.00048058	4.25704e-05
CHORS	0.00811744	0.00668203	0.00453539	0.000538437	4.76955e-05
IGPS	0.000872248	0.000718008	0.000487344	5.7857e-05	5.12505e-06
PHETA1	-0.00411247	-0.00338526	-0.00229772	-0.000272784	-2.41635e-05
PRAIi	0.000872248	0.000718008	0.000487344	5.7857e-05	5.12505e-06
PPNDH	0.00411247	0.00338526	0.00229772	0.000272784	2.41635e-05
PPND2	0.00313272	0.00257876	0.00175032	0.000207796	1.84069e-05
SHK3D	0.00811744	0.00668203	0.00453539	0.000538437	4.76955e-05
SHKK	0.00811744	0.00668203	0.00453539	0.000538437	4.76955e-05
TRPS1	0.000872248	0.000718008	0.000487344	5.7857e-05	5.12505e-06
TYRTA	-0.00313272	-0.00257876	-0.00175032	-0.000207796	-1.84069e-05
ACHBSm	0.00591839	0.00487184	0.00330673	0.000392572	3.47745e-05
IPPMIb	-0.00910332	-0.00749358	-0.00508622	-0.000603831	-5.34882e-05
IPPS	0.00910332	0.00749358	0.00508622	0.000603831	5.34882e-05
OMCDC	0.00910332	0.00749358	0.00508622	0.000603831	5.34882e-05
IPPMIa	-0.00910332	-0.00749358	-0.00508622	-0.000603831	-5.34882e-05
IPMD	0.00910332	0.00749358	0.00508622	0.000603831	5.34882e-05
KARA1m	0.01723	0.0141832	0.00962676	0.00114288	0.000101238
ACLSm	0.01723	0.0141832	0.00962676	0.00114288	0.000101238
DHAD1m	0.01723	0.0141832	0.00962676	0.00114288	0.000101238
DHAD2m	0.00591839	0.00487184	0.00330673	0.000392572	3.47745e-05
ILETA	-0.00591839	-0.00487184	-0.00330673	-0.000392572	-3.47745e-05
KARA2m	0.00591839	0.00487184	0.00330673	0.000392572	3.47745e-05
LEUTA	-0.00910332	-0.00749358	-0.00508622	-0.000603831	-5.34882e-05
VALTA	-0.00812665	-0.00668961	-0.00454053	-0.000539048	-4.77496e-05
Galkin
Gal7
Gal10
Mankin
M6pism
Tps1	0.000718683	0.000591599	0.000401544	4.76709e-05	4.22275e-06
Tps2	0.000718683	0.000591599	0.000401544	4.76709e-05	4.22275e-06
DAK	0.126132
GCY1	0.126132
ROS1	0.236484	0.177715	0.583756	1.94005	0.628122
ROS2	0.000675521	0.239561	3.15356	3.6836	5.00719
NADH2-u6m	0.0225157	0.0645272	0.787179	2.03124	2.72291
ComplexIII	0.0744707	0.117873	2.14205	3.28117	3.40369
ComplexIV	0.0744707	0.117873	2.14205	3.28117	3.40369
ATPS3m					0.0250332
ATPASE	0.256788	0.528653	1.10645	1.49814	0.285908
POSQt
POSQtm
Ht
Htm	0.349928	0.596786		15.6225	18.5069
IONPUMP	0.0759857	0.0625492	0.0424549	0.0050402	0.000446468
IONPUMPm
ACt-1	-0.0154917
ACt-1+H		-0.0746532	-0.304474	-0.687999	-0.991251
CO2t-1	-0.103745	-0.415934	-1.03269	-1.48938	-0.285132
CO2t-1+H	-1.5472	-1.34704	-2.44966	-2.65476	-3.38771
ETOHt+0	-1.40988	-1.42868	-0.478506	0.587433	1.36962
GLCt+0	1	1	1	1	1
GLYCt+0	0.126132	0.0998675	0.106094	0.541091	1.03571
H2Ot+0	1.4054	1.64013	4.11387	5.5672	5.30919
NH3t+1	0.171762	0.14139	0.0959673	0.0113931	0.00100922
NH3t+1-H					-2.77059e-14
O2t	0.0406672	0.0617613	1.07294	1.64081	1.70186
PIt-1
PIt-1+H	0.00607195	0.00499825	0.00339253	0.000402758	3.56768e-05
PYRt-1	-0.00554218	-0.00405292
PYRt-1+H		-0.00346936	-0.00565695	0.0139089	0.00991215
SO4t-2+2H
SO4t-2+H	0.00237411	0.0019543	0.00132647	0.000157477	1.39495e-05
SO4t-2
SUCCt-2+2H
SUCCt-2+H
SUCCt-2
2OBUTtm-1		0.000166861	0.000113256
2OBUTtm-1+H	0.000202706			1.34456e-05	1.19103e-06
2OXOADPAKGtm-2-2	0.00879005	0.00723571	0.00491119	0.000583052	5.16475e-05
3MOBtm-1	-0.01723			-0.00114288
3MOBtm-1+H		-0.0141832	-0.00962676		-0.000101238
3MOPtm-1	-0.00591839	-0.00487184	-0.00330673	-0.000392572
3MOPtm-1+H					-3.47745e-05
ACtm-1	-0.0116433			1.86487e-26
ACtm-1+H				-1.8655e-26
ACALDtm+0	0.0116433				0.377782
ALAtm+0			-0.007873
ADPATPtm-4-2	1.07867e-20			1.0136
ADPATPtm-4-3			0.552233
AKGMALtm-2-2	3.01927e-15	-0.0257573	0.978904	1.01426
ASPGLUtm-1-1
CITICITtm-3-3
CITMALtm-3-2
CITMALtm-3+H-2				-1.01614	-0.000353791
CO2tm-1	-0.0621047	-0.120347	-0.900241	-2.03543	-1.66435
CO2tm-1+H
ETOHtm+0
GLNtm+0		0.00406282
GLUtm-1			-0.532339
GLUtm-1+H	0.00987115
GLYtm+0			0.46129	-0.000134456
GLXtm-1			-0.46129
GLXtm-1+H				0.000134456
H2Otm+0	0.00135967	0.0245383	-0.668099	0.78272	0.302642
MALPItm-2-2		-0.0162867	0.524042	-1.0133
NH3tm+1			0.081244	0.000410092	2.44162e-05
NH3tm+1-H	-0.00571568	-0.00470498
O2tm+0	0.0372353	0.0589363	1.07103	1.64059	1.70184
OAAtm-2+2H		0.0394045	0.111183	1.01614
OAAtm-2+H
OAAtm-2					-0.000257191
ORNtm+1				1.05013e-25	-2.89998e-05
ORNtm+1-H	-0.00493557	-0.00406282	-0.00275761	-0.000327381
PItm-2+2H	0.0115051		6.23716	0.000442076	0.000286191
PItm-2+H
PItm-2		-0.0162867	-5.16089	-4.62588e-26
PYRtm-1		0.0471762
PYRtm-1+H	0.0327277		0.0463989	1.01675	0.303383
SUCCPItm-2-2	0.0115051	-2.26533e-23		0.000134456	0.000286191
SUCFUMtm-2-2	-0.0115051		-0.46129
THRtm+0	0.00571568	0.00470498	0.00319347	0.000379126	3.35835e-05
GALt+0
Mant+0
poscharge_EX	0.0386071	0.0317802	0.0215706	0.00256084	0.000226843
h_EX	0.639274	0.71228	1.42353	1.92549	2.08391
h2o_EX	-1.4054	-1.64013	-4.11387	-5.5672	-5.30919
nh3_EX	-0.171762	-0.14139	-0.0959673	-0.0113931	-0.00100922
pi_EX	-0.00607195	-0.00499825	-0.00339253	-0.000402758	-3.56768e-05
so4_EX	-0.00237411	-0.0019543	-0.00132647	-0.000157477	-1.39495e-05
gal-D_EX
man-D_EX
gthox_EX	-0.23716	-0.417276	-3.73731	-5.62366	-5.63531
gthrd_EX	0.47432	0.834552	7.47463	11.2473	11.2706
